# Supplementary material
Source: PubMed Central journal article supplement (PMC9991938)

**Figure S1**

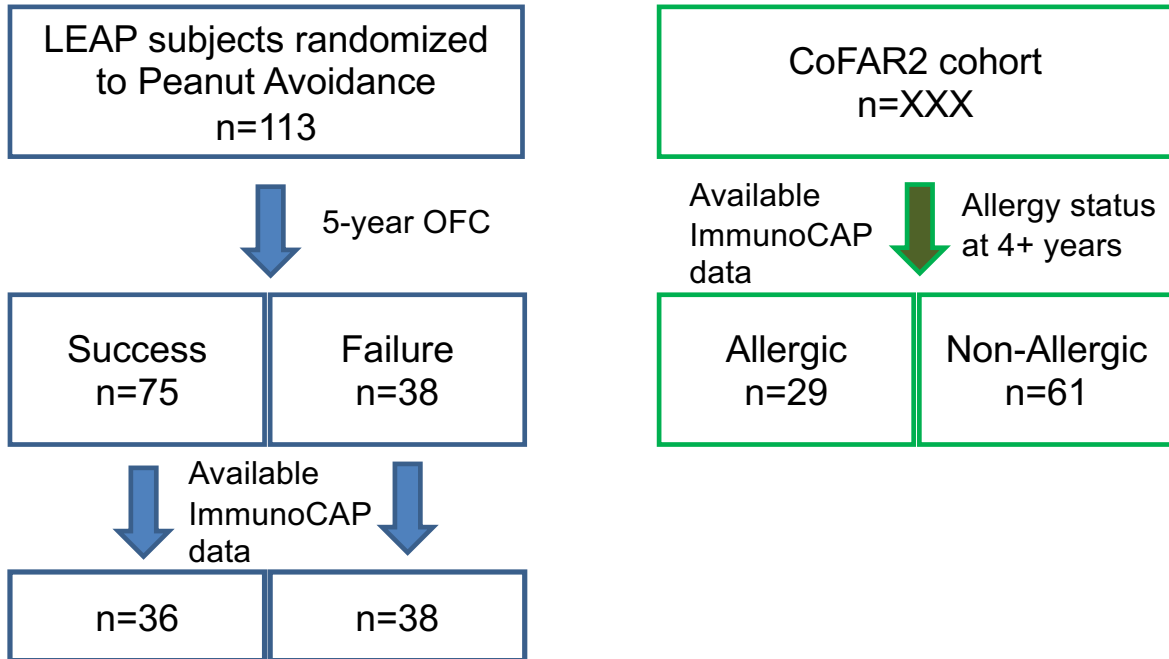

**Figure S2**

**A. ses-IgE+slgE**

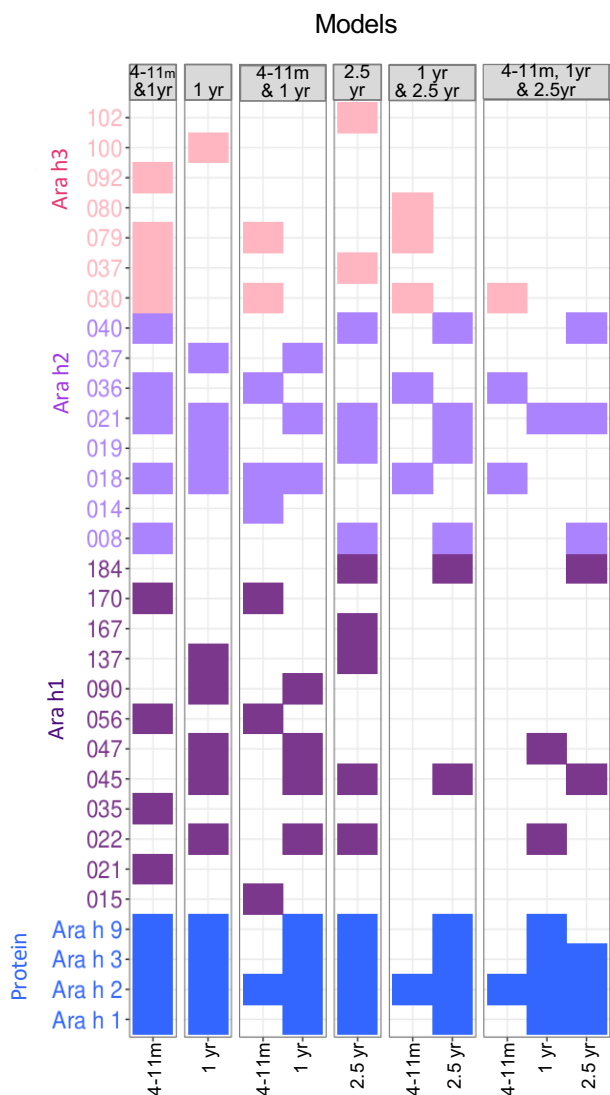

**B. ses-IgE+slgE+PN-slgE**

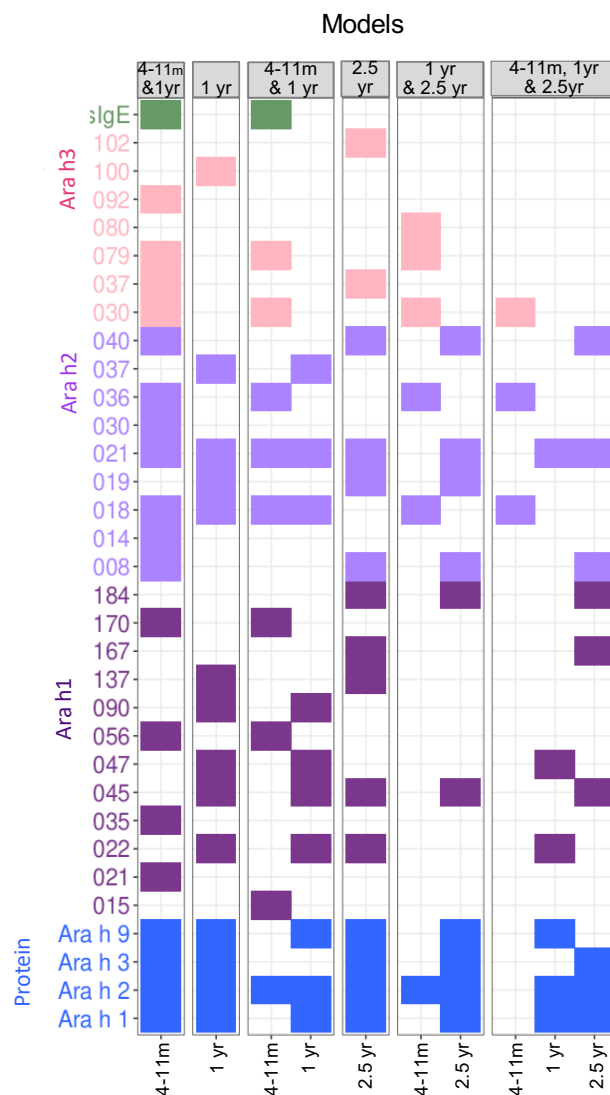

**C.**

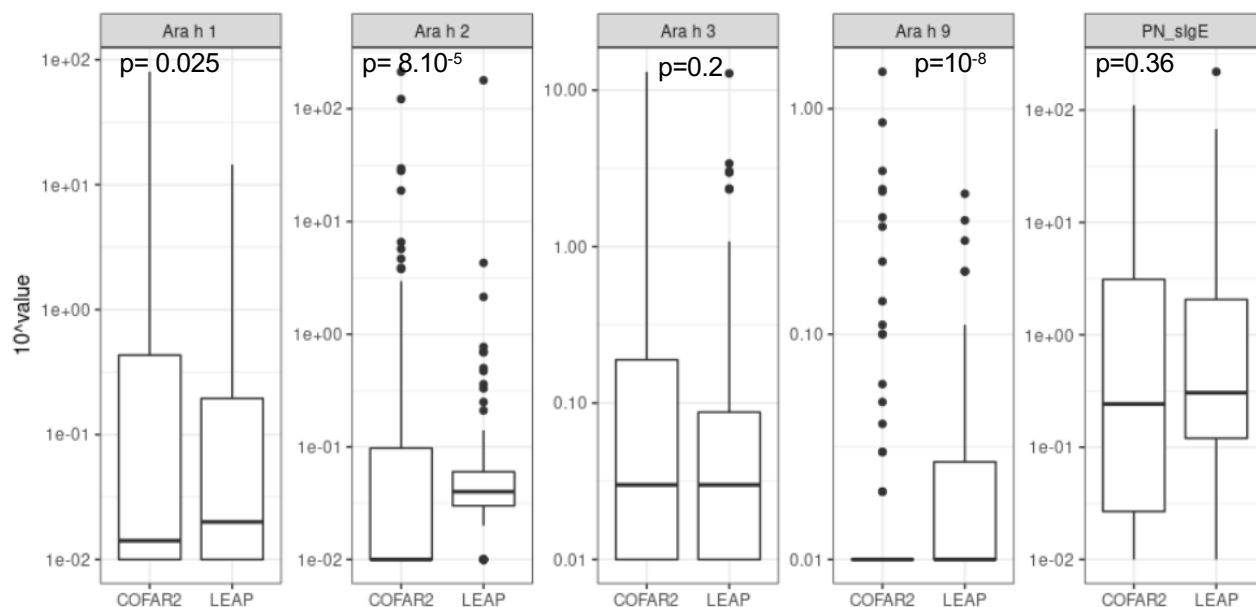

Supplement: NIHMS1835420-supplement-2.pdf [file NIHMS1835420-supplement-2.pdf]
